# Supplementary material for: Immunogenic cell death due to a new photodynamic therapy (PDT) with glycoconjugated chlorin (G-chlorin)
Source: PubMed Central journal article supplement (PMC5216938; doi:10.18632/oncotarget.9725), 2016-05-30
Supplement: oncotarget-07-47242-s001.pdf [file oncotarget-07-47242-s001.pdf]

## Immunogenic cell death due to a new photodynamic therapy (PDT) with glycoconjugated chlorin (G-chlorin)

### SUPPLEMENTARY FIGURES

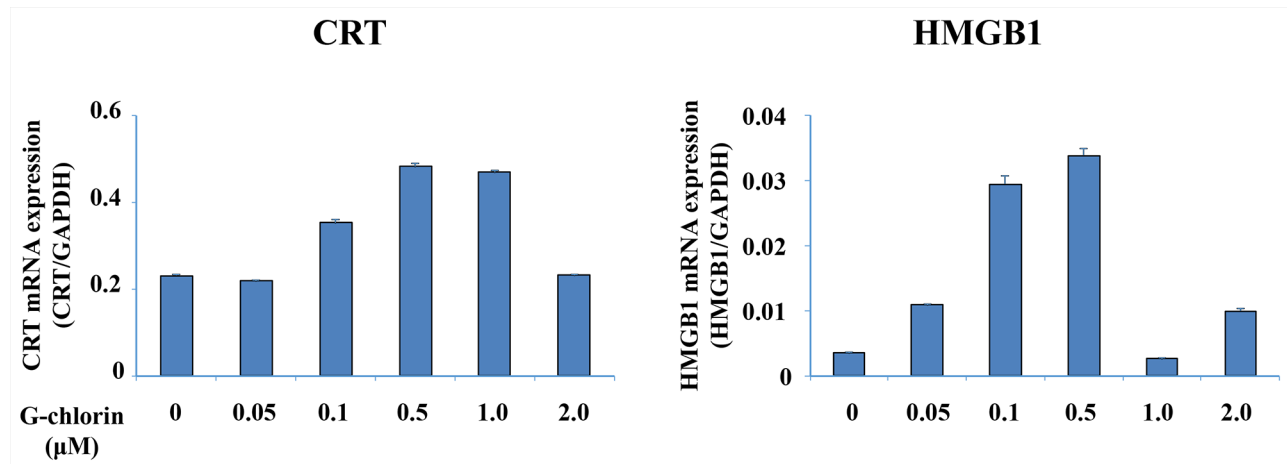

**Supplementary Figure S1: Expression of mRNA of CRT and HMGB1 by PDT.** CT26 cells were treated with G-chlorin for 4 hours and then irradiated with 16 J/cm<sup>2</sup> of 660-nm LED light. The CRT and HMGB1 mRNA expression levels were measured by real-time PCR immediately after the 4-hour treatment. Data are the means of three independent experiments  $\pm$  SD.

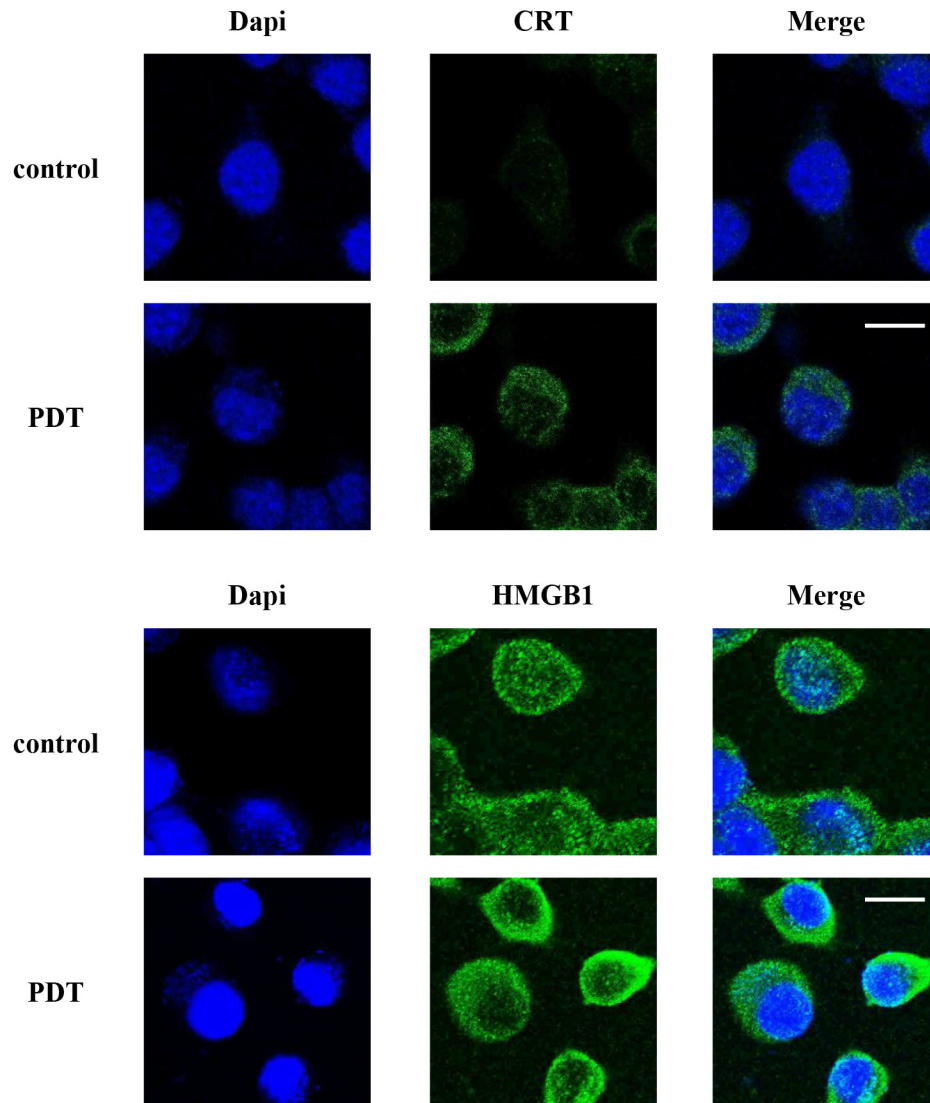

**Supplementary Figure S2: Translocation of CRT and HMGB1 by PDT at lower magnification.** CT26 cells were treated with G-chlorin for 4 hours and irradiated with 16 J/cm<sup>2</sup> of 660-nm LED light. Translocation of CRT and HMGB1 was assessed by immunofluorescence staining at 4 hours after treatment immediately after the 4-hour treatment. Images were obtained using confocal microscopy (original magnification  $\times 600$ ; scale bar = 10  $\mu\text{m}$ ).
